# Supplementary material for: Mining whole genome sequence data to efficiently attribute individuals to source populations
Source: PubMed Central journal article supplement (PMC7376179; doi:10.1038/s41598-020-68740-6), 2020-07-22
Supplement: 41598_2020_68740_MOESM2_ESM.pdf [file 41598_2020_68740_MOESM2_ESM.pdf]

# Mining Whole Genome Sequence data to efficiently attribute individuals to source populations

## Additional file 2: Supplementary figures

Francisco J. Pérez-Reche, Ovidiu Rotariu, Bruno S. Lopes, Ken J. Forbes and Norval J.C. Strachan

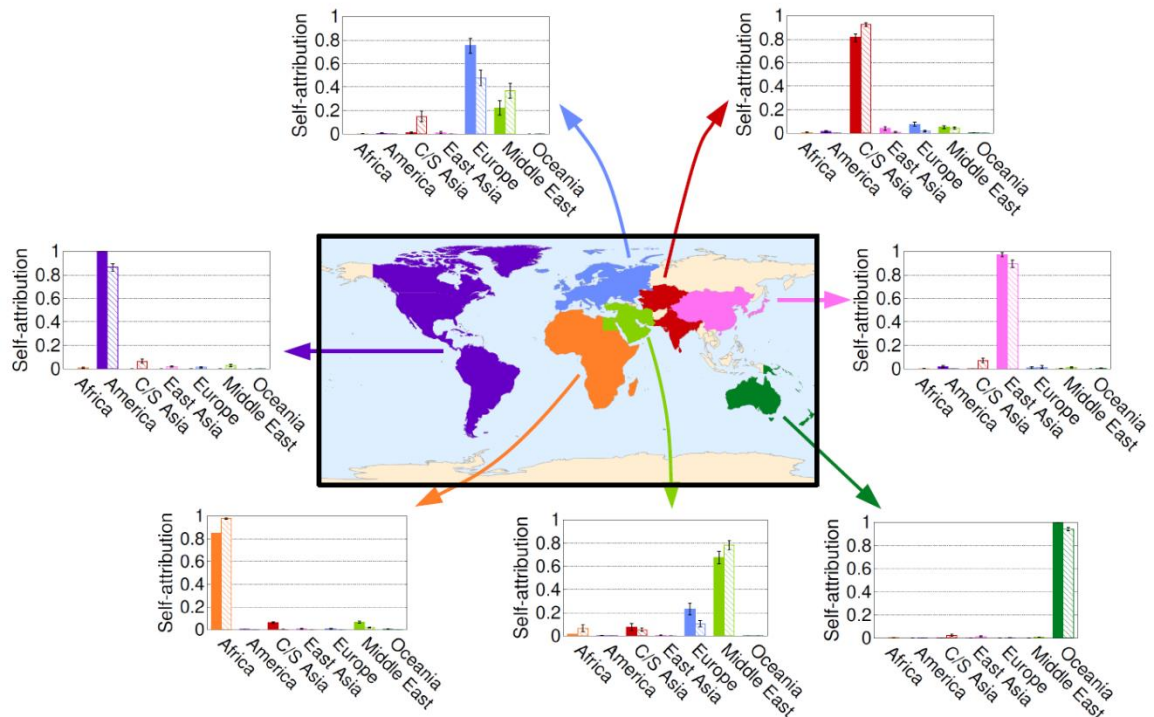

**Fig S1. Self-attribution of humans characterised by 645 microsatellite genotypes.** Bar charts show the probability distribution  $p_s$ . For a given source (region)  $s$ ,  $p_s$  gives the probability that any individual from the region indicated in the map is attributed to  $s$ . Solid and hatched bars show the results obtained with the MMD method and STRUCTURE, respectively.

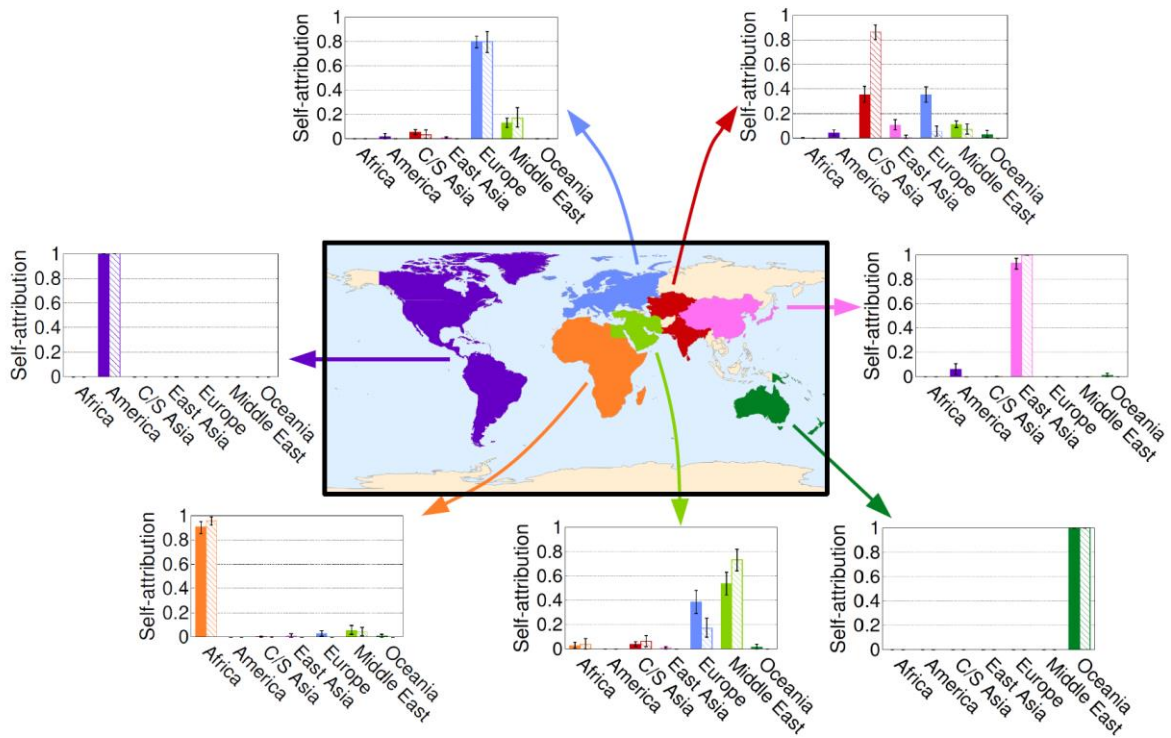

**Fig S2. Self-attribution of humans characterised by 2 810 SNP genotypes.** Bar charts show the probability distribution  $p_s$ . For a given source (region)  $s$ ,  $p_s$  gives the probability that any individual from the region indicated in the map is attributed to  $s$ . Solid and hatched bars show the results obtained with the MMD method and STRUCTURE, respectively.

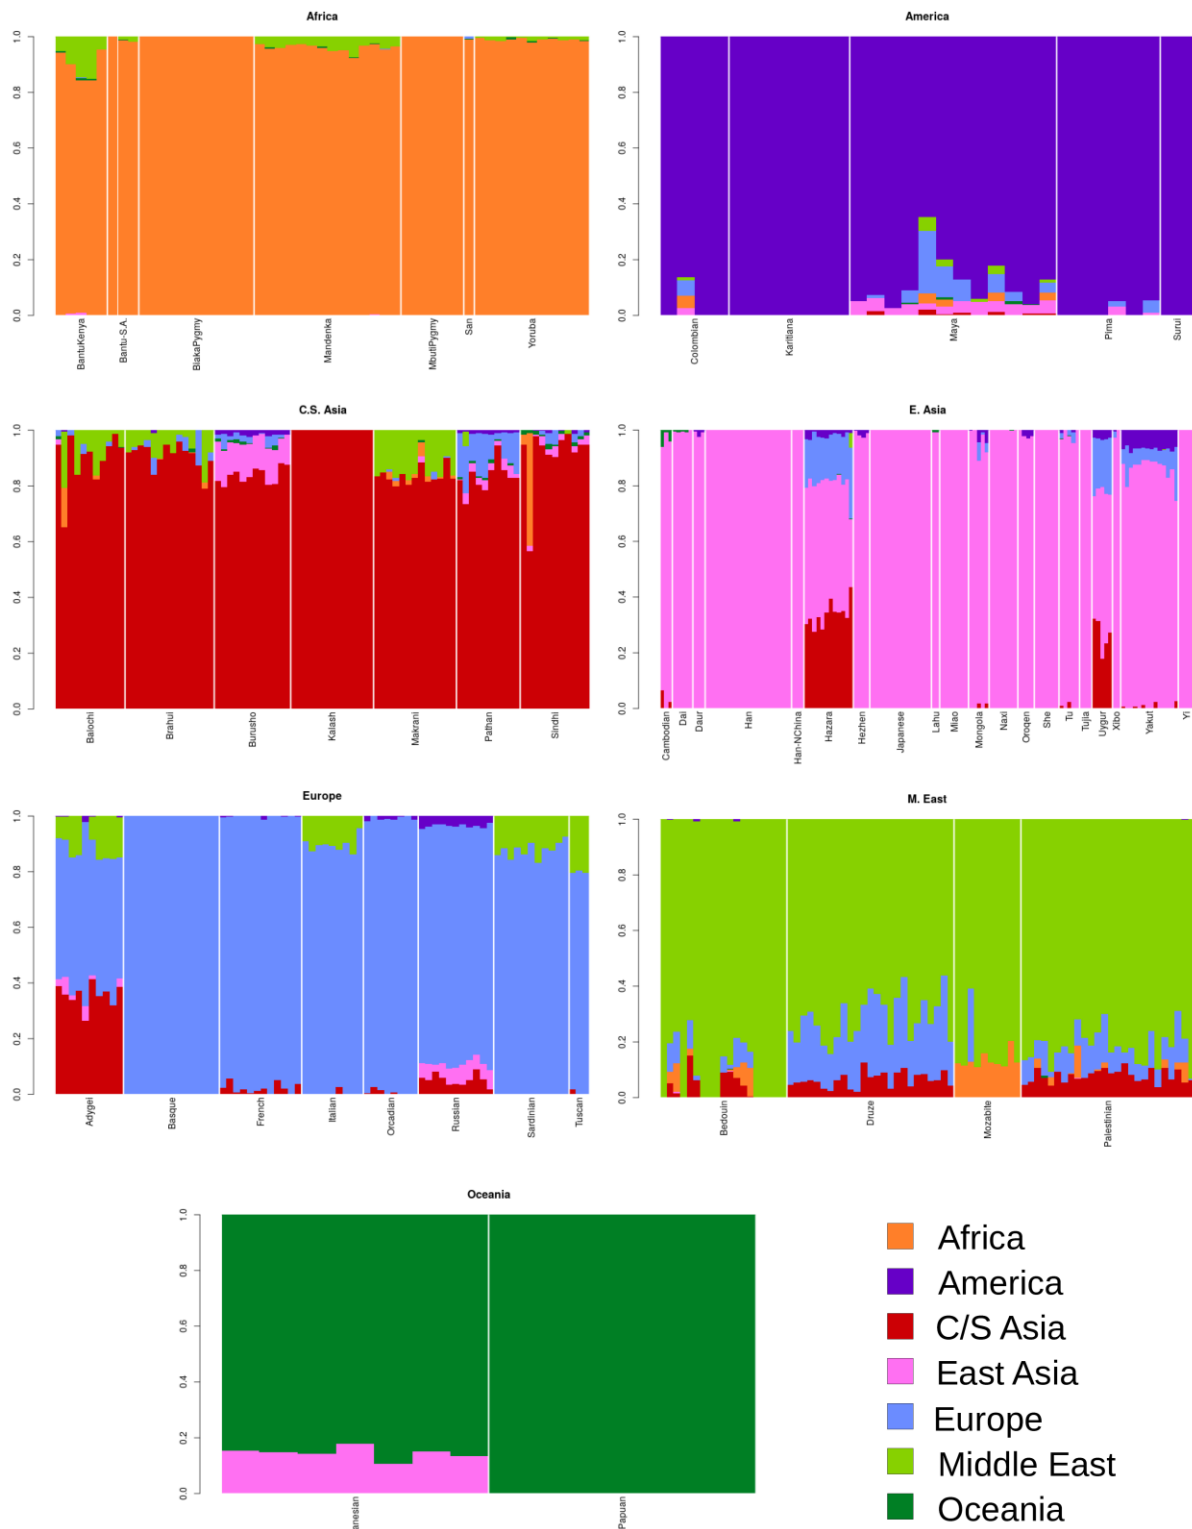

**Fig S3. Supervised ADMIXTURE analysis of ancestry based on 659 271 SNP genotypes.** Each panel shows the inferred admixture of 50% of individuals  $u$  selected from the geographical region indicated in the title of the panel. Each individual  $u$  is indicated by a vertical line, which is partitioned in segments of different colours that represent the admixture proportion  $h_{u,s}$  of the individual from region  $s$ . The correspondence between regions and colours is given by the legend. Vertical white lines separate individuals from different populations.

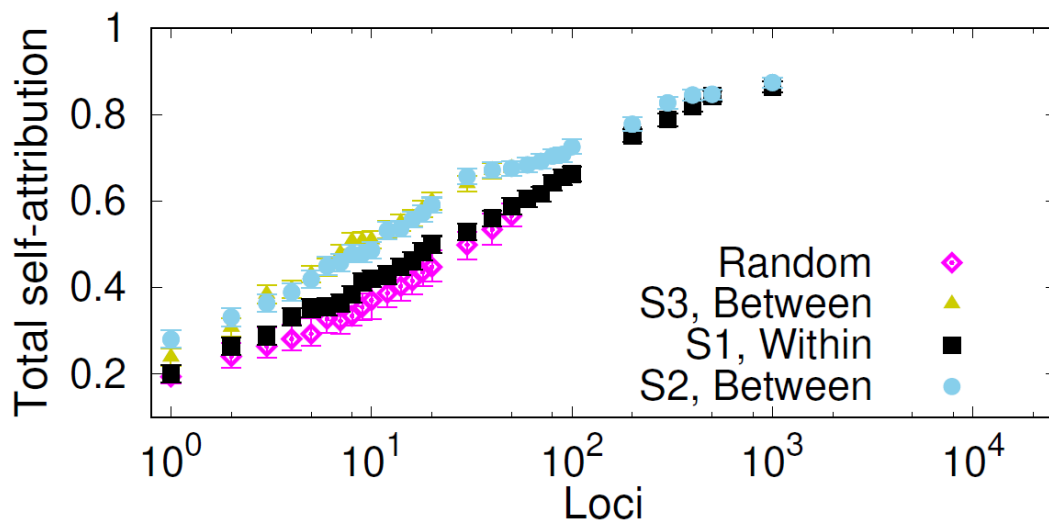

**Fig S4. Selection of markers for self-attribution of humans based on 645 microsatellite genotypes.** Symbols show the self-attribution probability  $p^{sa}$  that individuals from any of the 7 regions in the data set are correctly attributed to their region. The probability is plotted as a function of the number of SNPs selected at random and with strategies S1 (loci ranked in decreasing within-source diversity), S2 (loci ranked in decreasing between-source diversity) and S3 (reordering the loci ranking of S2 to reduce loci redundancy).

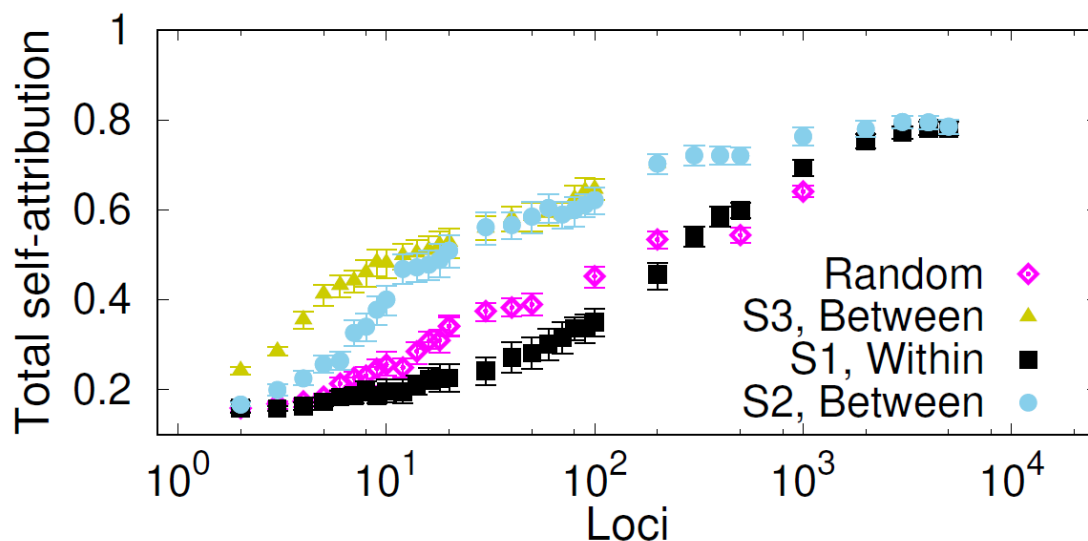

**Fig S5. Selection of markers for self-attribution of humans based on 2 810 SNP genotypes.** Symbols show the self-attribution probability  $p^{sa}$  that individuals from any of the 7 regions in the data set are correctly attributed to their region. The probability is plotted as a function of the number of SNPs selected at random and with strategies S1 (loci ranked in decreasing within-source diversity), S2 (loci ranked in decreasing between-source diversity) and S3 (reordering the loci ranking of S2 to reduce loci redundancy).

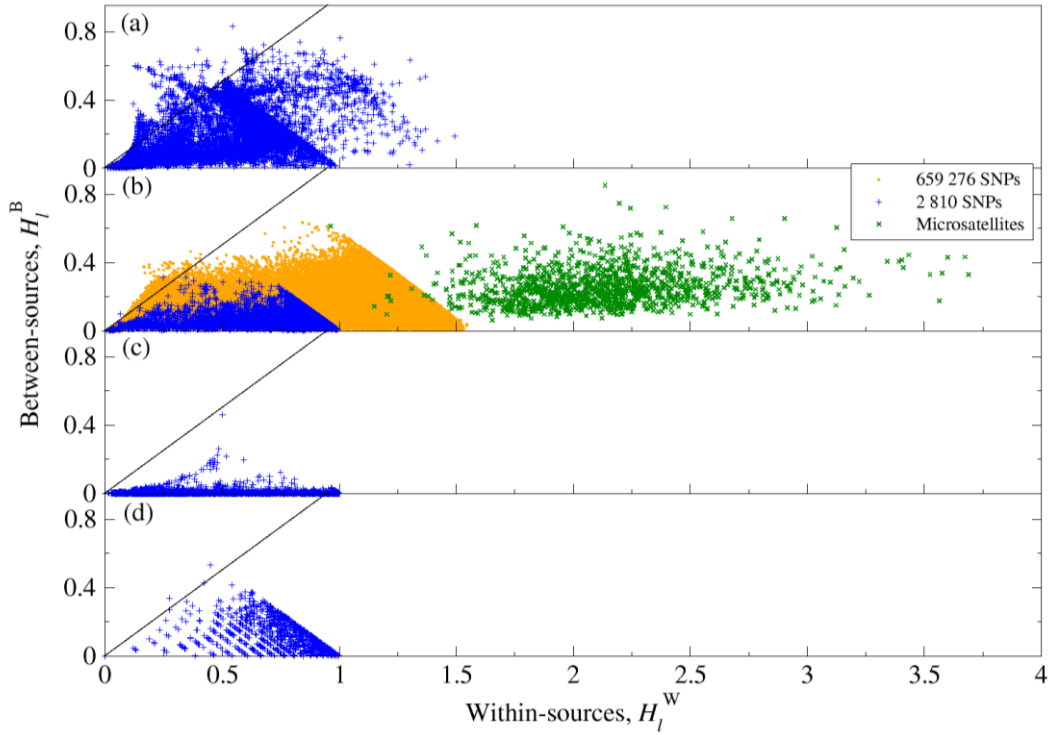

**Fig S6. Within- and between-sources allele diversity quantified by entropies.** Symbols show the entropy between sources,  $H_l^B$ , vs. the entropy within sources,  $H_l^W$ , for (a) *Campylobacter* cgSNPs, (b) Human SNPs and microsatellites, (c) *P. californicus* SNPs and (d) breast cancer proteotypes. Most of the data lay on the right of the line  $H_l^B = H_l^W$ , i.e. the diversity within sources is larger than the entropy between sources for most loci in all the data sets.

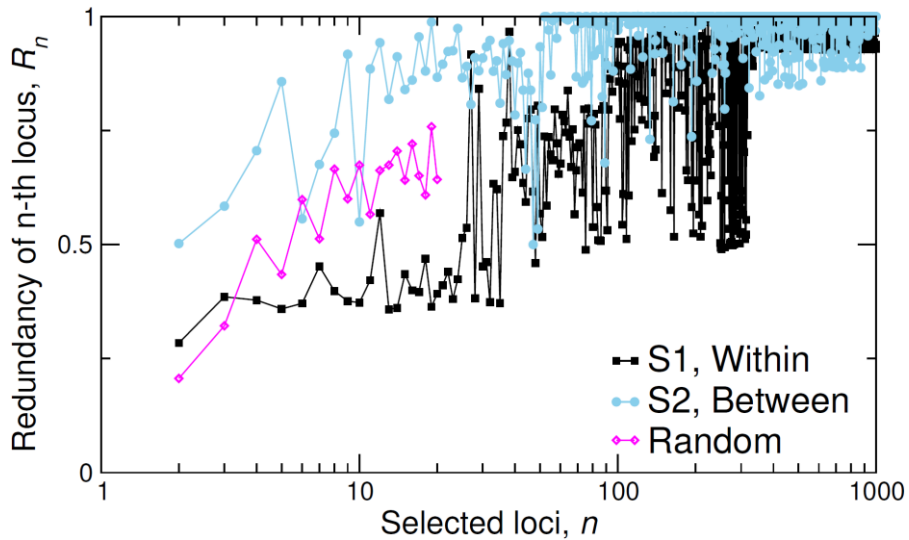

**Fig S7. Redundancy  $R_n$  of the  $n$ -th selected locus from 25 938 cgSNP *Campylobacter* genotypes.** The redundancy  $R_n$  is given by Eq. (6) in the main text. The dependence of  $R_n$  on  $n$  is shown for randomly selected loci (pink diamonds) and loci ranked with strategies S1 (black squares) and S2 (blue circles).

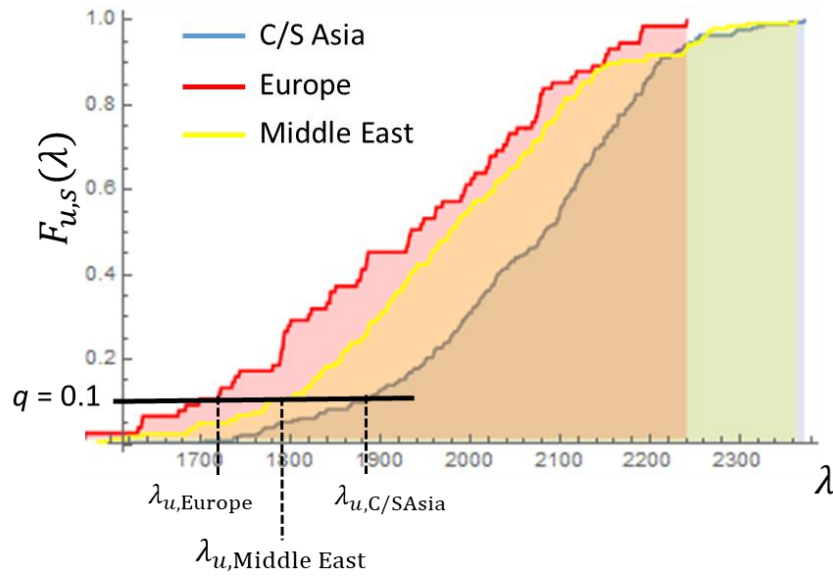

**Fig S8. Example of the determination of the minimum  $q$ -quantile,  $\lambda_{min}(q)$ , in the MMD method.** The curves show the cumulative distribution function  $F_{u,s}(\lambda)$  which gives the probability that the Hamming distance between an individual of unknown origin,  $u$ , and any genotype from source  $s$  is smaller than  $\lambda$ . This example corresponds to 2810 SNP genotypes of humans from three regions: C/S Asia, Europe and Middle East. For a probability  $q = 0.1$ , one obtains the minimum  $q$ -quantile  $\lambda_{min}(q) = \lambda_{u,Europe}$ . The genotype of  $u$  is closest to Europe, followed by Middle East and C/S Asia.

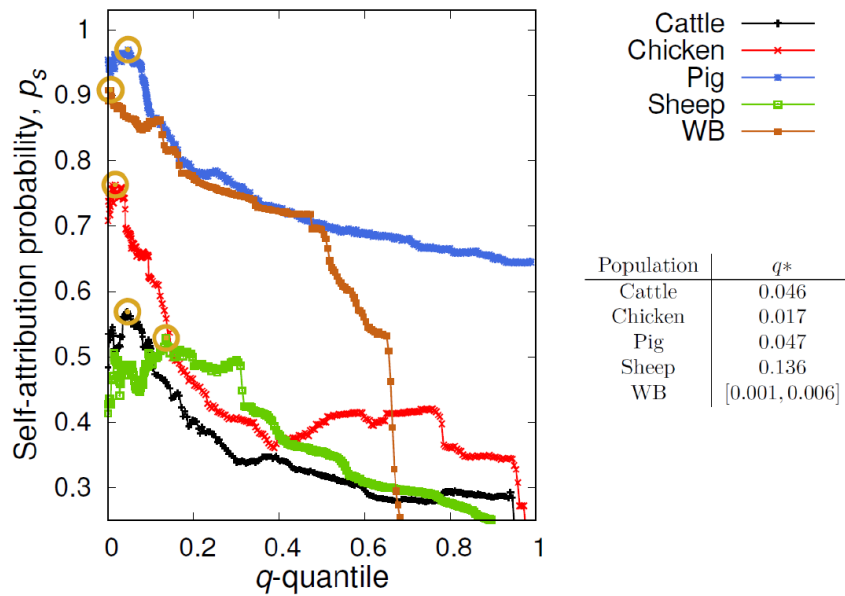

**Fig. S9 Self-attribution probability  $p_s$  based on 25 938 cgSNP *Campylobacter* genotypes.** Different curves show the probability  $p_s$  that a removed individual from a food reservoir  $s$  (see legend) is correctly attributed to  $s$ . The circles indicate the point with maximum self-attribution probability for each source population. The values  $q^*$  (or intervals) of the  $q$ -quantile giving the maximum probability are given in the table.

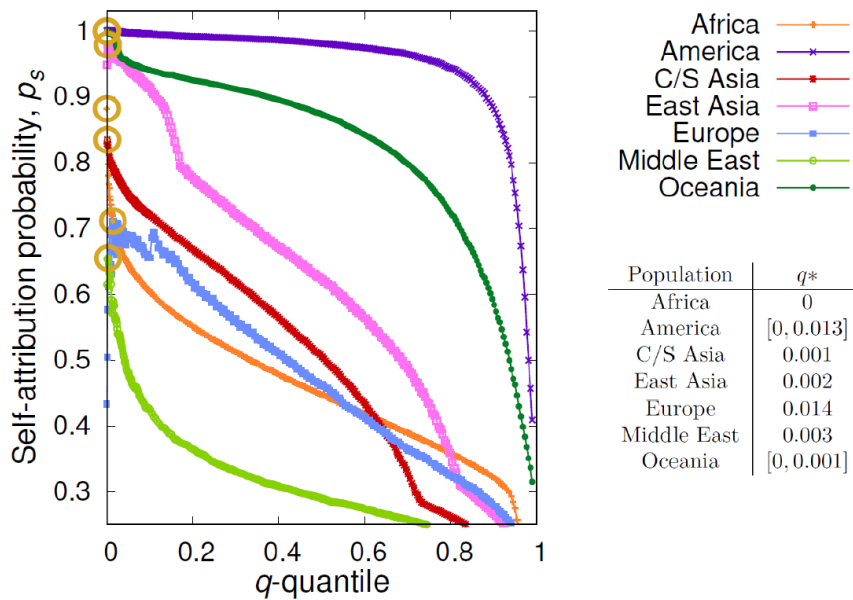

**Fig. S10 Self-attribution probability  $p_s$  based on 645 microsatellite human genotypes.** Different curves show the probability  $p_s$  that a removed individual from region  $s$  (see legend) is correctly attributed to  $s$ . The circles indicate the point with maximum self-attribution probability for each source population. The values  $q^*$  (or intervals) of the  $q$ -quantile giving the maximum probability are given in the table.

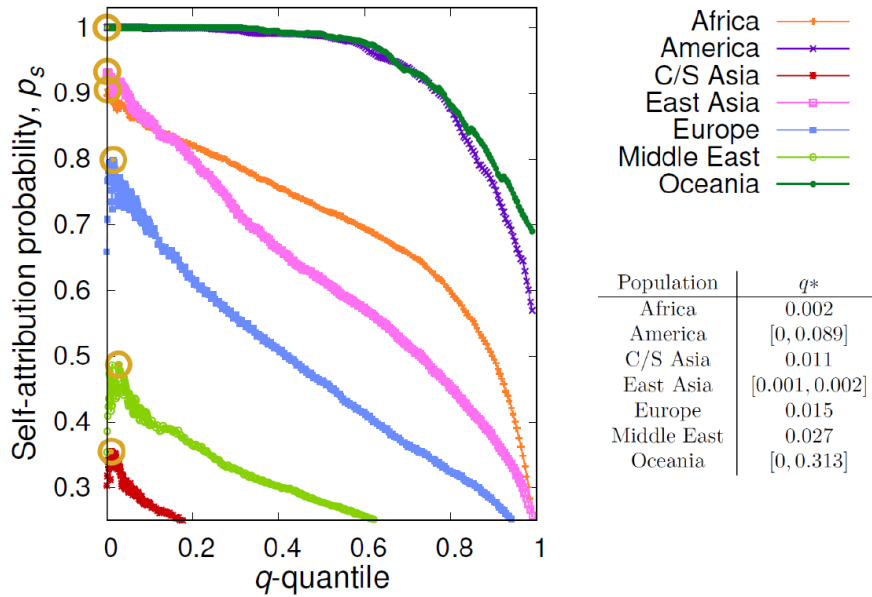

**Fig. S11 Self-attribution probability  $p_s$  based on 2 810 SNP human genotypes.** Different curves show the probability  $p_s$  that a randomly individual from region  $s$  (see legend) is correctly attributed to  $s$ . The circles indicate the point with maximum self-attribution probability for each source population. The values  $q^*$  (or intervals) of the  $q$ -quantile giving the maximum probability are given in the table.

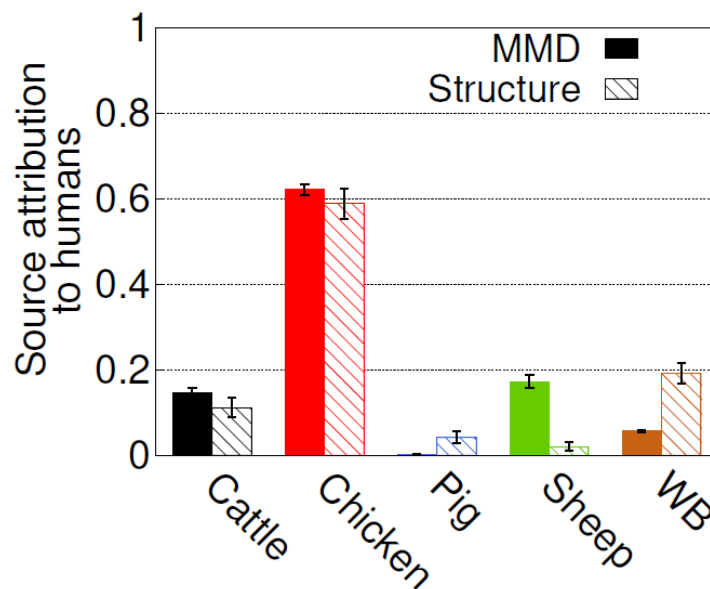

**Fig. S12 Source attribution of human 500 human *Campylobacter* isolates.** The bar chart shows the source attribution probability distribution  $p_s$  obtained with MMD (quantile  $q=0$ , solid bars) and STRUCTURE (hatched bars) methods. Results based on 25938 cgSNP genotypes.



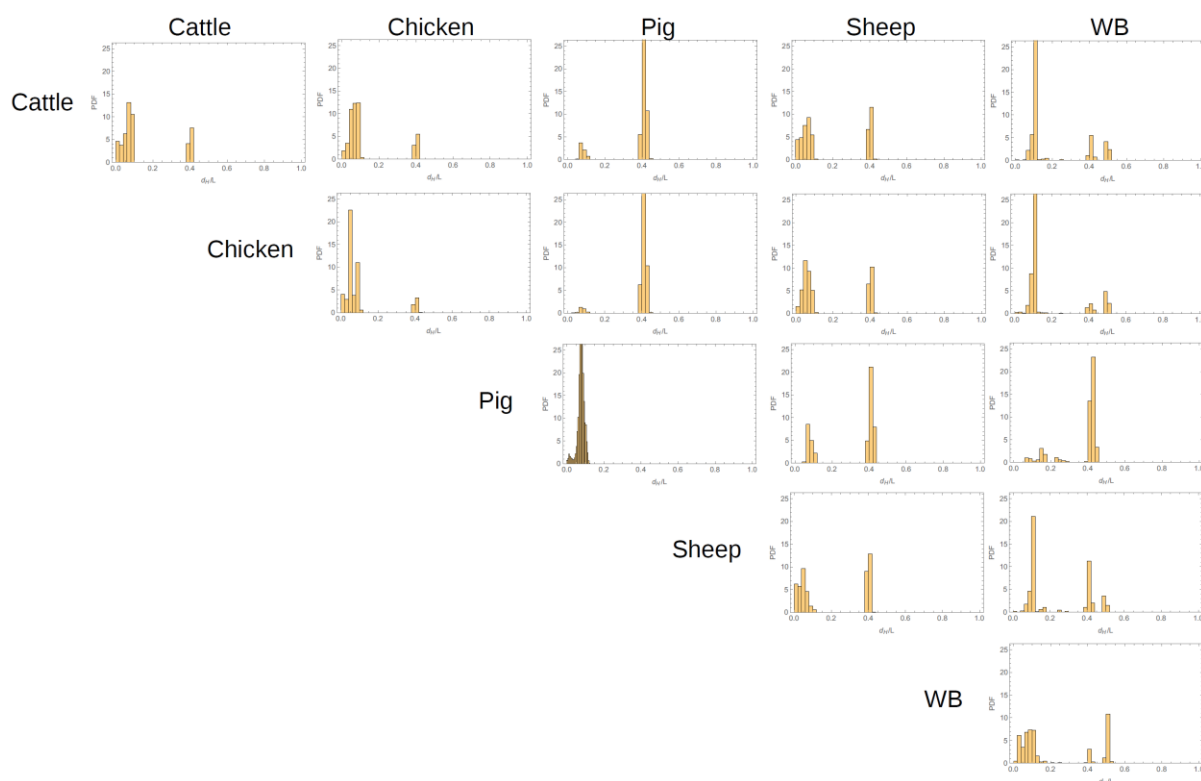

**Fig. S13 Hamming distance between and within sources for *Campylobacter* isolates based on 25 938 cgSNP genotypes.** Each panel shows the density histogram for the Hamming distance,  $d_H$ , between pairs of genotypes from the sources indicated by the row and column labels. The horizontal axis of each plot ranges between 0 and 1 and shows the Hamming distance normalised to the total number of loci,  $L = 25\,938$ , in each genotype.
