# Supplementary material for: Mining whole genome sequence data to efficiently attribute individuals to source populations
Source: PubMed Central journal article supplement (PMC7376179; doi:10.1038/s41598-020-68740-6), 2020-07-22
Supplement: 41598_2020_68740_MOESM3_ESM.pdf [file 41598_2020_68740_MOESM3_ESM.pdf]

# Mining Whole Genome Sequence data to efficiently attribute individuals to source populations

## Additional file 3: Supplementary tables

Francisco J. Pérez-Reche, Ovidiu Rotariu, Bruno S. Lopes, Ken J. Forbes and Norval J.C. Strachan

**Table S1. Allele-frequency divergence for *Campylobacter* sources based on 25 938 cgSNPs.** Cells indicate the value of the allele-frequency divergence and blue bars give a visual representation of the value in the cell.

|         | Cattle | Chicken | Pig    | Sheep  |
|---------|--------|---------|--------|--------|
| WB      | 0.0645 | 0.0959  | 0.3015 | 0.0828 |
| Sheep   | 0.0236 | 0.0583  | 0.222  |        |
| Pig     | 0.3279 | 0.4092  |        |        |
| Chicken | 0.0292 |         |        |        |

**Table S2. Allele-frequency divergence for Humans based on 645 microsatellite genotypes.** Cells indicate the value of the allele-frequency divergence and blue bars give a visual representation of the value in the cell.

|             | Africa | America | C/S Asia | East-Asia | Europe | Middle-East |
|-------------|--------|---------|----------|-----------|--------|-------------|
| Oceania     | 0.0412 | 0.0506  | 0.0264   | 0.0248    | 0.0349 | 0.033       |
| Middle-East | 0.0185 | 0.0423  | 0.0079   | 0.024     | 0.0044 |             |
| Europe      | 0.0261 | 0.0412  | 0.0081   | 0.0243    |        |             |
| East-Asia   | 0.0357 | 0.0316  | 0.017    |           |        |             |
| C/S Asia    | 0.0244 | 0.035   |          |           |        |             |
| America     | 0.0548 |         |          |           |        |             |

**Table S3. Allele-frequency divergence for Humans based on 2 810 SNP genotypes.** Cells indicate the value of the allele-frequency divergence and blue bars give a visual representation of the value in the cell.

|             | Africa | America | C/S Asia | East-Asia | Europe | Middle-East |
|-------------|--------|---------|----------|-----------|--------|-------------|
| Oceania     | 0.0548 | 0.0656  | 0.0404   | 0.0398    | 0.0515 | 0.044       |
| Middle-East | 0.0306 | 0.0438  | 0.0054   | 0.0306    | 0.005  |             |
| Europe      | 0.047  | 0.0488  | 0.0073   | 0.0374    |        |             |
| East-Asia   | 0.0482 | 0.0344  | 0.0239   |           |        |             |
| C/S Asia    | 0.0347 | 0.0377  |          |           |        |             |
| America     | 0.0663 |         |          |           |        |             |

**Table S4. Allele-frequency divergence for Humans based on 659 276 SNP genotypes.** Cells indicate the value of the allele-frequency divergence and blue bars give a visual representation of the value in the cell.

|             | Africa      | America     | C/S Asia    | East-Asia   | Europe      | Middle-East |
|-------------|-------------|-------------|-------------|-------------|-------------|-------------|
| Oceania     | 0.064121636 | 0.00901646  | 0.009537095 | 0.00397227  | 0.027877831 | 0.019187964 |
| Middle-East | 0.067584773 | 0.018132307 | 0.002310077 | 0.012970799 | 0.002605231 |             |
| Europe      | 0.088160012 | 0.025433483 | 0.00625519  | 0.020048184 |             |             |
| East-Asia   | 0.064896711 | 0.00263804  | 0.005942497 |             |             |             |
| C/S Asia    | 0.064709747 | 0.010672819 |             |             |             |             |
| America     | 0.068563086 |             |             |             |             |             |

**Table S5. Allele-frequency divergence for breast tumour proteotypes.** Cells indicate the value of the allele-frequency divergence and blue bars give a visual representation of the value in the cell.

|      | ERPR        | Her2        |
|------|-------------|-------------|
| TN   | 0.142210795 | 0.140692476 |
| Her2 | 0.126142554 |             |

**Table S6. Self-attribution probabilities for *Campylobacter* genotypes.** Columns indicate the actual source of isolates used for self-attribution and rows give the inferred source. Numerical values give the probability that genotypes from a source given by a column are attributed to the sources given by the rows. Results are shown for MMD and STRUCTURE (columns marked as “STR”).

| Inferred source |      | Actual source |      |         |      |      |      |       |      |      |     |
|-----------------|------|---------------|------|---------|------|------|------|-------|------|------|-----|
|                 |      | Cattle        |      | Chicken |      | Pig  |      | Sheep |      | WB   |     |
|                 |      | MMD           | STR  | MMD     | STR  | MMD  | STR  | MMD   | STR  | MMD  | STR |
| Cattle          | 0.58 | 0.51          | 0.06 | 0.03    | 0.00 | 0.00 | 0.45 | 0.45  | 0.00 | 0.01 |     |
| Chicken         | 0.10 | 0.34          | 0.74 | 0.73    | 0.05 | 0.0  | 0.07 | 0.23  | 0.05 | 0.12 |     |
| Pig             | 0.00 | 0.09          | 0.03 | 0.03    | 0.95 | 0.76 | 0.00 | 0.18  | 0.00 | 0.09 |     |
| Sheep           | 0.31 | 0.02          | 0.06 | 0.02    | 0.00 | 0.00 | 0.45 | 0.08  | 0.04 | 0.00 |     |
| WB              | 0.01 | 0.04          | 0.11 | 0.19    | 0.00 | 0.24 | 0.03 | 0.06  | 0.91 | 0.78 |     |

**Table S7. Self-attribution probabilities for humans characterised by 645 microsatellite genotypes.** Columns indicate the actual source of isolates used for self-attribution and rows give the inferred source. Numerical values give the probability that genotypes from a source given by a column are attributed to the sources given by the rows. Results are shown for MMD and STRUCTURE (columns marked as “STR”).

| Inferred source |      | Actual source |      |         |      |          |      |           |      |        |      |             |      |         |     |
|-----------------|------|---------------|------|---------|------|----------|------|-----------|------|--------|------|-------------|------|---------|-----|
|                 |      | Africa        |      | America |      | C/S Asia |      | East-Asia |      | Europe |      | Middle-East |      | Oceania |     |
|                 |      | MMD           | STR  | MMD     | STR  | MMD      | STR  | MMD       | STR  | MMD    | STR  | MMD         | STR  | MMD     | STR |
| Africa          | 0.85 | 0.98          | 0.00 | 0.01    | 0.00 | 0.01     | 0.00 | 0.03      | 0.00 | 0.00   | 0.01 | 0.06        | 0.00 | 0.00    |     |
| America         | 0.00 | 0.00          | 1.00 | 0.87    | 0.01 | 0.00     | 0.02 | 0.00      | 0.00 | 0.00   | 0.00 | 0.00        | 0.00 | 0.00    |     |
| C/S Asia        | 0.06 | 0.00          | 0.00 | 0.06    | 0.82 | 0.93     | 0.00 | 0.07      | 0.02 | 0.15   | 0.08 | 0.05        | 0.00 | 0.03    |     |
| East-Asia       | 0.01 | 0.00          | 0.00 | 0.02    | 0.04 | 0.01     | 0.97 | 0.89      | 0.01 | 0.00   | 0.01 | 0.00        | 0.00 | 0.02    |     |
| Europe          | 0.01 | 0.00          | 0.00 | 0.01    | 0.08 | 0.01     | 0.01 | 0.01      | 0.75 | 0.48   | 0.23 | 0.11        | 0.00 | 0.00    |     |
| Middle-East     | 0.06 | 0.02          | 0.00 | 0.03    | 0.05 | 0.04     | 0.00 | 0.01      | 0.22 | 0.37   | 0.67 | 0.78        | 0.00 | 0.01    |     |
| Oceania         | 0.01 | 0.00          | 0.00 | 0.00    | 0.00 | 0.00     | 0.00 | 0.00      | 0.00 | 0.00   | 0.00 | 0.00        | 1.0  | 0.94    |     |

**Table S8. Self-attribution probabilities for humans characterised by 2 810 SNP genotypes.** Columns indicate the actual source of isolates used for self-attribution and rows give the inferred source. Numerical values give the probability that genotypes from a source given by a column are attributed to the sources given by the rows. Results are shown for MMD and STRUCTURE (columns marked as “STR”).

| Inferred source |      | Actual source |      |         |      |          |      |           |      |        |      |             |      |         |      |
|-----------------|------|---------------|------|---------|------|----------|------|-----------|------|--------|------|-------------|------|---------|------|
|                 |      | Africa        |      | America |      | C/S Asia |      | East-Asia |      | Europe |      | Middle-East |      | Oceania |      |
|                 |      | MMD           | STR  | MMD     | STR  | MMD      | STR  | MMD       | STR  | MMD    | STR  | MMD         | STR  | MMD     | STR  |
| Africa          | 0.91 | 0.96          | 0.00 | 0.00    | 0.00 | 0.00     | 0.00 | 0.00      | 0.00 | 0.00   | 0.00 | 0.02        | 0.04 | 0.00    | 0.00 |
| America         | 0.00 | 0.00          | 1.00 | 1.00    | 0.04 | 0.00     | 0.06 | 0.00      | 0.01 | 0.00   | 0.00 | 0.00        | 0.00 | 0.00    | 0.00 |
| C/S Asia        | 0.00 | 0.00          | 0.00 | 0.00    | 0.36 | 0.87     | 0.00 | 0.00      | 0.05 | 0.03   | 0.04 | 0.06        | 0.00 | 0.00    |      |
| East-Asia       | 0.01 | 0.00          | 0.00 | 0.00    | 0.11 | 0.01     | 0.93 | 1.00      | 0.01 | 0.00   | 0.01 | 0.00        | 0.00 | 0.00    |      |
| Europe          | 0.03 | 0.00          | 0.00 | 0.00    | 0.35 | 0.05     | 0.00 | 0.00      | 0.80 | 0.80   | 0.38 | 0.17        | 0.00 | 0.00    |      |
| Middle-East     | 0.05 | 0.04          | 0.00 | 0.00    | 0.11 | 0.07     | 0.00 | 0.00      | 0.13 | 0.17   | 0.54 | 0.73        | 0.00 | 0.00    |      |
| Oceania         | 0.00 | 0.00          | 0.00 | 0.00    | 0.03 | 0.00     | 0.01 | 0.00      | 0.00 | 0.00   | 0.01 | 0.00        | 1.00 | 1.00    |      |

**Table S9. Self-attribution probabilities for humans characterised by 659 276 SNP genotypes.** Columns indicate the actual source of isolates used for self-attribution and rows give the inferred source. Numerical values give the probability that genotypes from a source given by a column are attributed to the sources given by the rows. Results are shown for MMD and ADMIXTURE (columns marked as “ADM”).

| Inferred source |      | Actual source |      |         |      |          |      |           |      |        |      |             |      |         |      |
|-----------------|------|---------------|------|---------|------|----------|------|-----------|------|--------|------|-------------|------|---------|------|
|                 |      | Africa        |      | America |      | C/S Asia |      | East-Asia |      | Europe |      | Middle-East |      | Oceania |      |
|                 |      | MMD           | ADM  | MMD     | ADM  | MMD      | ADM  | MMD       | ADM  | MMD    | ADM  | MMD         | ADM  | MMD     | ADM  |
| Africa          | 1.00 | 0.97          | 0.00 | 0.00    | 0.00 | 0.01     | 0.00 | 0.00      | 0.00 | 0.00   | 0.00 | 0.00        | 0.03 | 0.00    | 0.00 |
| America         | 0.00 | 0.00          | 1.00 | 0.95    | 0.00 | 0.00     | 0.00 | 0.01      | 0.00 | 0.01   | 0.00 | 0.00        | 0.00 | 0.00    | 0.00 |
| C/S Asia        | 0.00 | 0.00          | 0.00 | 0.00    | 0.90 | 0.89     | 0.00 | 0.05      | 0.00 | 0.06   | 0.00 | 0.05        | 0.00 | 0.00    |      |
| East-Asia       | 0.00 | 0.00          | 0.00 | 0.02    | 0.10 | 0.02     | 1.00 | 0.91      | 0.00 | 0.01   | 0.00 | 0.00        | 0.00 | 0.07    |      |
| Europe          | 0.00 | 0.00          | 0.00 | 0.02    | 0.00 | 0.02     | 0.00 | 0.03      | 1.00 | 0.87   | 0.10 | 0.11        | 0.00 | 0.00    |      |
| Middle-East     | 0.00 | 0.03          | 0.00 | 0.01    | 0.00 | 0.04     | 0.00 | 0.00      | 0.00 | 0.05   | 0.90 | 0.81        | 0.00 | 0.00    |      |
| Oceania         | 0.00 | 0.00          | 0.00 | 0.00    | 0.00 | 0.00     | 0.00 | 0.00      | 0.00 | 0.00   | 0.00 | 0.00        | 1.00 | 0.93    |      |
