# Supplementary material for: Mining whole genome sequence data to efficiently attribute individuals to source populations
Source: PubMed Central journal article supplement (PMC7376179; doi:10.1038/s41598-020-68740-6), 2020-07-22
Supplement: 41598_2020_68740_MOESM7_ESM.pdf [file 41598_2020_68740_MOESM7_ESM.pdf]

# Mining Whole Genome Sequence data to efficiently attribute individuals to source populations

## Additional file 7: Exclusion method

Francisco J. Pérez-Reche, Ovidiu Rotariu, Bruno S. Lopes, Ken J. Forbes and Norval J.C. Strachan

Here, we apply the threshold exclusion method proposed in [1] to the MMD source attribution results. The exclusion method consists in setting a threshold  $T$  for the probability  $p_{u,s}$  such that an individual  $u$  is assigned to source  $s$  if  $p_{u,s} \geq T$ . Otherwise, if  $p_{u,s} < T$ , the individual cannot be attributed to the source  $s$ . When  $p_{u,s} < T$  for all the sampled sources,  $s \in \mathcal{S}$ , the individual is not assigned to any source. The performance of this method was explored to test the MMD attribution results for human genotypes with 659 276 SNPs and *Campylobacter* genotypes with 25 937 SNPs. For the human example, we focused on self-attribution to 7 geographical regions. In this case, a very small proportion of genotypes are excluded even for very selective values of  $T$  (see Fig. AF7.1). In fact, only 2% of individuals are excluded from all regions for  $T = 1$ . In fact, for  $T = 1$ , all individuals are attributed to the correct source except for 10% of individuals that are excluded from Middle East and 1% that are excluded from C/S Asia. To some extent, the high accuracy found for this dataset could be expected since we are dealing with self-attribution and the true region of individuals has been sampled for sure.

Exclusion is more prominent for *Campylobacter* isolates (see Fig. AF7.2). For  $T > 0.9$ , more than 60% of isolates from human patients are excluded from all sources. Since the origin of human isolates is unknown, one could conclude that there is a high percentage of isolates that originated from sources that were not sampled. However, this is not a solid conclusion since the method also predicts high exclusion percentages ( $> 37\%$  on average for  $T > 0.9$ ) for isolates from food and animal sources whose true source is known. The exclusion percentage is particularly high for sheep (all isolates excluded from all sources for  $T > 0.7$ ) and cattle (52% excluded for any  $T > 0.8$ ). High exclusion rates in this example are likely due to a low genetic differentiation between sources. In this situation, forcing assignment to a single source is not well justified.

---

[1] S. Manel, P. Berthier, and G. Luikart, [Conservation Biology](#) **16**, 650 (2002).

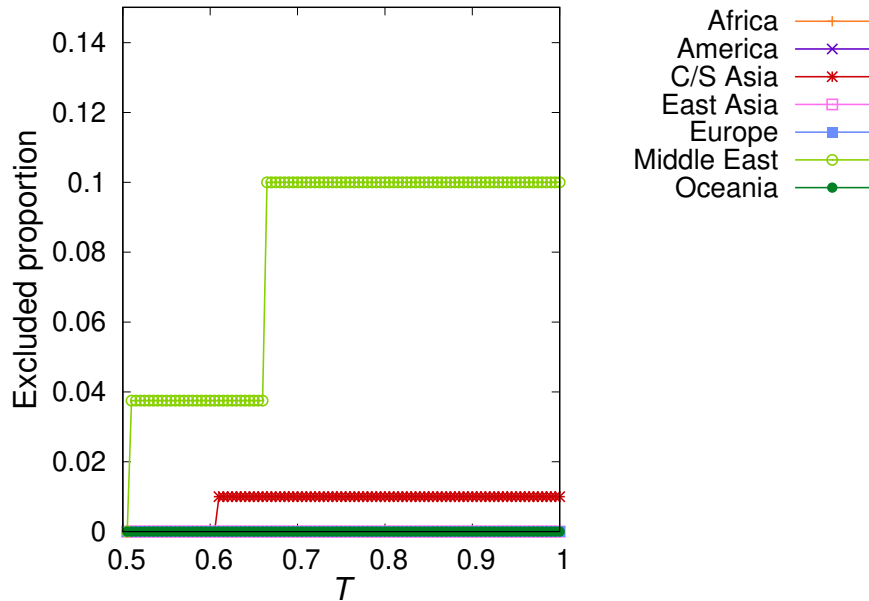

Fig. AF7.1. **Exclusion test for humans based on 659 276 SNP genotypes.** For a given geographical region, the proportion of individuals that are not attributed to any region (i.e. individuals with  $p_{u,s} < T$  for all regions,  $s$ ) is plotted as a function of the exclusion threshold,  $T$ . Different symbols correspond to individuals from different regions, as marked by the legend.

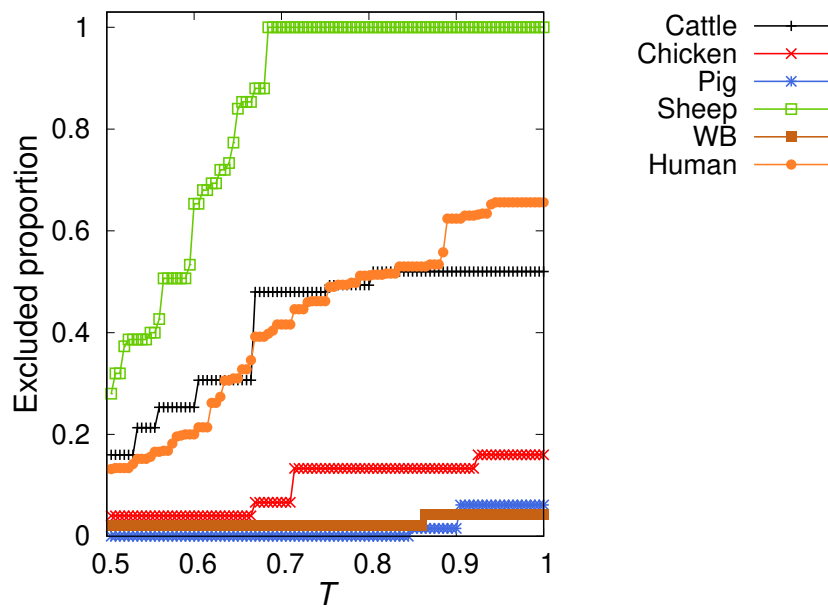

Fig. AF7.2. **Exclusion test for Campylobacter isolates based on 25 938 cgSNP genotypes.** For a given Campylobacter reservoir, the proportion of isolates that are not attributed to any source (i.e. isolates with  $p_{u,s} < T$  for all sources) is plotted as a function of the exclusion threshold,  $T$ . Different symbols correspond to isolates from different reservoirs, as marked by the legend.
